# Supplementary material for: De novo transcriptome assembly for rudimentary leaves in Litchi chinesis Sonn. and identification of differentially expressed genes in response to reactive oxygen species
Source: PubMed Central journal article supplement (PMC4190417; doi:10.1186/1471-2164-15-805), 2014-09-20

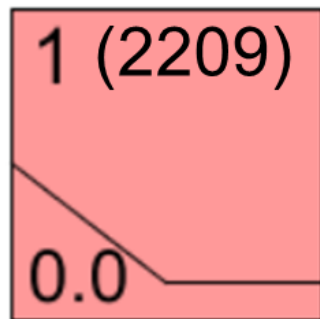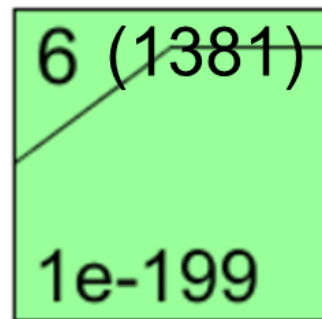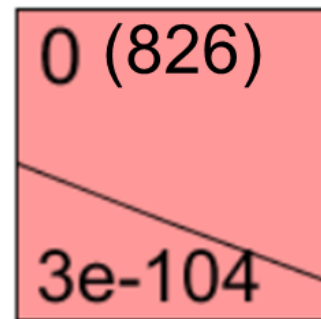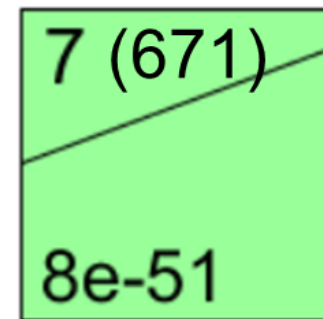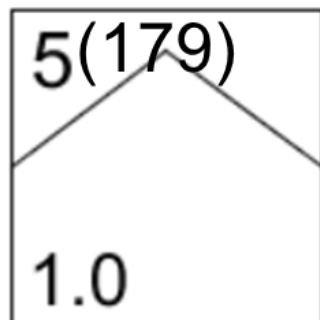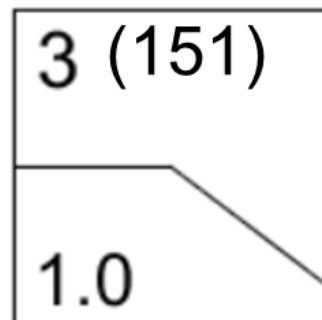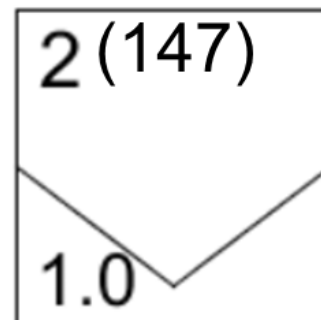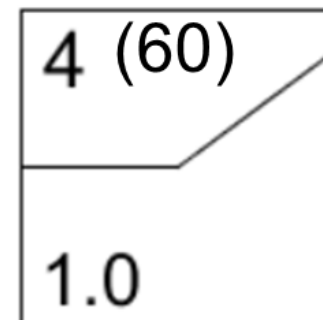

Supplement: 12864_2014_6499_MOESM7_ESM.pdf [file 12864_2014_6499_MOESM7_ESM.pdf]
