# Supplementary material for: De novo transcriptome assembly for rudimentary leaves in Litchi chinesis Sonn. and identification of differentially expressed genes in response to reactive oxygen species
Source: PubMed Central journal article supplement (PMC4190417; doi:10.1186/1471-2164-15-805), 2014-09-20
Supplement: 12864_2014_6499_MOESM8_ESM.pdf [file 12864_2014_6499_MOESM8_ESM.pdf]

Primer sequences of the reference gene and candidate unigenes for qRT-PCR

| Homology gene                                               | Unigene ID | Forward primer (5'→3') | Reverse primer (5'→3')  |
|-------------------------------------------------------------|------------|------------------------|-------------------------|
| <i>Actin</i>                                                |            | AGTTTGGTTGATGTGGGAGAC  | TGGCTGAACCCGAGATGAT     |
| <i>Class I Beta-1,3-glucanase</i>                           | LC0049290  | AATGTTGGAGCCTCTTAGTGC  | TGCTATTGCTTGGTCTCTTCAT  |
| <i>Citinase</i>                                             | LC0046650  | GCTGTCTTGAAGGCAATAACTG | ACCTGGAACTACAACATATGGAG |
| <i>Beta xylosidase</i>                                      | LC0042331  | CCAGGATAGCCAACCCAC     | TTGACCAGTCCATAGAAGCAGA  |
| <i>polygalacturonase</i>                                    | LC0036733  | TTTCTGGGCTGGCGAGTT     | AAGCATACCTGACCCGATAC    |
| <i>Phenylalanine ammonia-lyase</i>                          | LC0032641  | ACAAGTTCAGCAAGATACGA   | AGTGTGACAAGGTGTTTACGGC  |
| <i>Peroxidase precursor</i>                                 | LC0017420  | ATCCAACCTTAGATGCCACA   | AGTTGTTATCAAATCCGTTAGG  |
| <i>cellulose synthase</i>                                   | LC0047175  | AATAGCCTGTCCTCCAGCCTCT | CACGAACCTGTCAAACCTGCCTT |
| <i>Abscisic acid receptor PYL5-like</i>                     | LC0076273  | CAATCTGAGCCAGGGACT     | GCTTCAGCGTAGTTGGTG      |
| <i>Abscisic acid receptor PYR1</i>                          | LC0059406  | GTCGTCGTCCAGAATGTC     | TACCAACTCCACTCAAACCAAT  |
| <i>Protein phosphatase 2C (PP2C)</i>                        | LC0032232  | ACAACAGAAACGGCAGAA     | GAATAGCACTTTGGACGC      |
| <i>Serine/threonine-protein kinase SRK2E-like isoform 1</i> | LC0030437  | TATCGCTGAAGCCACCAT     | ACACCCCAGTAATCCAAG      |
| <i>Abscisic acid responsive element-binding protein 2</i>   | LC0035532  | GTCTCCTCAGCAGTCCA      | GCCTTCAGTCTATTCGTTG     |
| <i>Ethylene response 3</i>                                  | LC0020885  | TGATTCAGTTCGTGGCATT    | CCATTTTCAGGAGCAGAGG     |
| <i>Mitogen-activated protein kinase</i>                     | LC0022597  | TCAACGGCGGAAGTCAAA     | TCAACACCGAGCAAACGA      |
| <i>Ein3-binding f-box protein 3</i>                         | LC0036588  | AAGTATTCCAGAGCGACA     | CTCAGCAACAAAACATATCC    |
| <i>Ethylene-insensitive 3b</i>                              | LC0035971  | AGGAATGAGGGTTGTAAT     | TCTTGTAAGGCGGAGGAC      |
| <i>ERF transcription factor 4</i>                           | LC0002478  | GCTCTATCATAAGCCAAGG    | AAGAAGCCAAACCAACAC      |
